# Supplementary material for: Mechanical stress triggers nuclear remodeling and the formation of transmembrane actin nuclear lines with associated nuclear pore complexes
Source: PubMed Central journal article supplement — Mol Biol Cell. 2020 Jul 21;31(16):1774–87. doi: 10.1091/mbc.E19-01-0027 (PMC7521858; doi:10.1091/mbc.e19-01-0027), 2020-07-21
Supplement: mbc-31-1774-s001.pdf [file mbc-31-1774-s001.pdf]

# Supplemental Materials

*Molecular Biology of the Cell*

Hoffman et al.

| YAP/TAZ target genes | Descriptor                                                     | Log 2-fold change | p-value | x-fold up-regulation | Reference                                                           |
|----------------------|----------------------------------------------------------------|-------------------|---------|----------------------|---------------------------------------------------------------------|
| AREG                 | Amphiregulin (EGFR ligand)                                     | 5.4               | 4.0e131 | 42                   | Zhang, Ji et al. 2009                                               |
| CTGF                 | Connective tissue growth factor                                | 2.6               | 1.3e9   | 6.1                  | Cordenonsi, Zanconato et al. 2011<br>Zanconato, Forcato et al. 2015 |
| CYR61                | Cysteine rich angiogenic inducer 61 or heparin binding protein | 1.7               | 1.6e11  | 3.2                  | Cordenonsi, Zanconato et al. 2011<br>Zanconato, Forcato et al. 2015 |
| DUSP1                | Dual specificity phosphatase 1                                 | 2.4               | 3.2e17  | 5.3                  | Cordenonsi, Zanconato et al. 2011                                   |
| FGF2                 | Fibroblast growth factor                                       | 3.0               | 1.7e73  | 8.0                  | Cordenonsi, Zanconato et al. 2011                                   |
| FOSL1                | Fos-like 1 (AP-1 transcription factor)                         | 2.3               | 3.4e27  | 4.9                  | Zanconato, Forcato et al. 2015                                      |
| GADD45B              | Growth arrest and DNA damage inducible beta                    | 2.6               | 1.4e35  | 6.1                  | Cordenonsi, Zanconato et al. 2011                                   |
| SERPINE1             | Serine protease inhibitor 1                                    | 3.3               | 2.4e32  | 10.6                 | Cordenonsi, Zanconato et al. 2011                                   |
| TNNT2                | Troponin T2 (Tropomyosin-binding)                              | 2.7               | 9.9e20  | 6.5                  | Cordenonsi, Zanconato et al. 2011                                   |

| MRTF-A target genes | Descriptor                                                             | Log 2-fold change | p-value | x-fold up-regulation | Reference                    |
|---------------------|------------------------------------------------------------------------|-------------------|---------|----------------------|------------------------------|
| ATF3                | Activating transcription factor 3 (cAMP-dep)                           | 6.3               | 1.3e51  | 74                   | Gegenfurtner 2018<br>Yu 2018 |
| CSRN1               | Cys/Ser-rich nuclear prot1 (xtion activator)                           | 4.7               | 2.3e171 | 26                   | Yu 2018                      |
| CTGF                | Connective tissue growth factor (matricellular)                        | 2.6               | 4.2e11  | 6.1                  | Yu 2018<br>Foster 2018       |
| CYR61               | Cys-rich angiogenic inducer 61 (matricellular)                         | 1.7               | 4.6e13  | 3.2                  | Yu 2018<br>Foster 2018       |
| DLX2                | Distal-less homeobox prot2 (xtion activator)                           | 1.6               | 3.8e17  | 3.0                  | Yu 2018                      |
| DUSP1               | Dual specificity phosphatase 1                                         | 2.4               | 3.2e17  | 5.3                  | Yu 2018                      |
| DUSP5               | Dual specificity phosphatase 5                                         | 3.9               | 4.3e50  | 15                   | Gegenfurtner 2018<br>Yu 2018 |
| EGR3                | Early growth response 3 (xtion factor)                                 | 1.9               | 3.5e15  | 3.7                  | Gegenfurtner 2018<br>Yu 2018 |
| ERRF1               | ERBB receptor feedback inhibitor1 (neg reg ERBB)                       | 2.1               | 5.7e19  | 4.3                  | Yu 2018                      |
| FOSB                | Oncogene? (AP-1 xtion cofactor)                                        | 7.0               | 4.6e61  | 128                  | Gegenfurtner 2018            |
| HBEGF               | Heparin-binding EGF-like growth factor                                 | 4.2               | 5.3e57  | 18                   | Yu 2018                      |
| HIVP3               | Human immunodeficiency virus enhancer binding protein 3 (xtion factor) | 2.0               | 5.8e13  | 4.0                  | Gegenfurtner 2018            |
| IER2                | Immediate early response 2 (xtion factor)                              | 2.0               | 6.2e22  | 4.0                  | Yu 2018                      |
| ITGA5               | Integrin alpha5 (FN receptor)                                          | 2.1               | 3.4e32  | 4.3                  | Foster 2018                  |
| KDM6B               | Lysine demethylase 6B (H3 K27 epigenet)                                | 2.0               | 9.3e25  | 4.0                  | Gegenfurtner 2018<br>Yu 2018 |
| LIF                 | Leukemia inhibitory factor (cytokine)                                  | 2.7               | 1.7e20  | 6.5                  | Yu 2018                      |
| MAFF                | Musculo Aponeurotic Fibrosarcoma Oncogene Homolog F (xtion reg)        | 3.8               | 4.7e86  | 14                   | Yu 2018                      |
| NFKBIZ              | NF-kappaB-zeta (xtion reg)                                             | 2.5               | 5.3e10  | 5.7                  | Yu 2018                      |
| NR4A1               | Nuclear receptor subfamily4 groupA member 1 (xtion reg)                | 4.7               | 1.5e51  | 26                   | Gegenfurtner 2018<br>Yu 2018 |
| NR4A2               | Nuclear receptor subfamily4 groupA member 2 (xtion reg)                | 1.9               | 7.5e26  | 3.7                  | Yu 2018                      |
| NR4A3               | Nuclear receptor subfamily4 groupA member 2 (xtion reg)                | 3.9               | 4.1e18  | 15                   | Yu 2018                      |
| PPP1R15A            | Protein phosphatase 1 regulatory subunit 15A                           | 4.8               | 5.8e130 | 28                   | Yu 2018                      |
| PTGER4              | Prostaglandin E2 receptor 4 (g-prot regulated)                         | 4.2               | 3.8e93  | 18                   | Yu 2018                      |
| TUFT1               | Tuftelin (glycoprotein involved in dental enamelization?)              | 2.6               | 2.4e63  | 6.1                  | Yu 2018                      |
| ZFP36               | Zinc finger protein 36 (RNA binding)                                   | 2.4               | 1.2e62  | 5.3                  | Yu 2018                      |

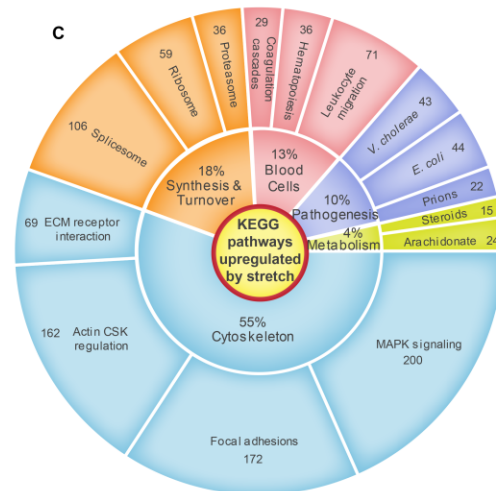

**Supplemental Figure S1. Gene expression analysis of stretch-stimulated cells.** mRNAs up-regulated by uniaxial cyclic stretch stimulation (15%, 0.5 Hz, 6hrs) of mouse fibroblasts were identified by RNA sequencing analysis of 4 pairs (unstretched and stretch-stimulated) cell samples. Searches for genes that were characterized as YAP/TAZ target genes and MRTF-A target genes in several published reports were identified. **A.** 9 YAP/TAZ target genes and **B.** 25 MRTF-A target genes upregulated by stretch stimulation. These genes are shown with log 2-fold change, p-values, references, and descriptors. **C.** KEGG pathway analysis of the RNAseq data including the top 15 pathways is summarized in a circular form. Pathways for MAPK signaling, Focal adhesions, Actin cytoskeleton regulation, and ECM receptor interaction are the most highly represented as stretch-stimulated pathways.

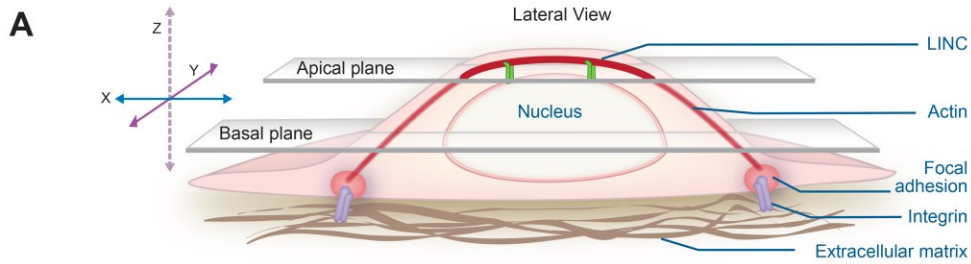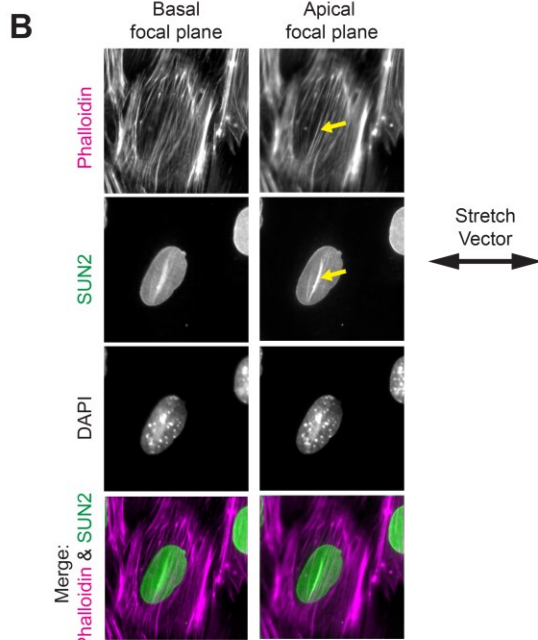

**Supplemental Figure S2. SUN2 on Apical focal plane of nuclei in stretch-stimulated and migrating cells.**

**A.** Model of cell showing apical or dorsal surface of nucleus in contact with actin stress fiber, and basal plane towards bottom of cell with stress fiber anchorage at integrin-based focal adhesions.

**B.** Paired fluorescent images of basal focal plane and apical focal plane of phalloidin (magenta), SUN2-specific antibody (green), and DAPI staining. Cell and nucleus align perpendicular to the stretch vector and the SUN2 signal is in focus on the top surface of the nucleus (arrow).

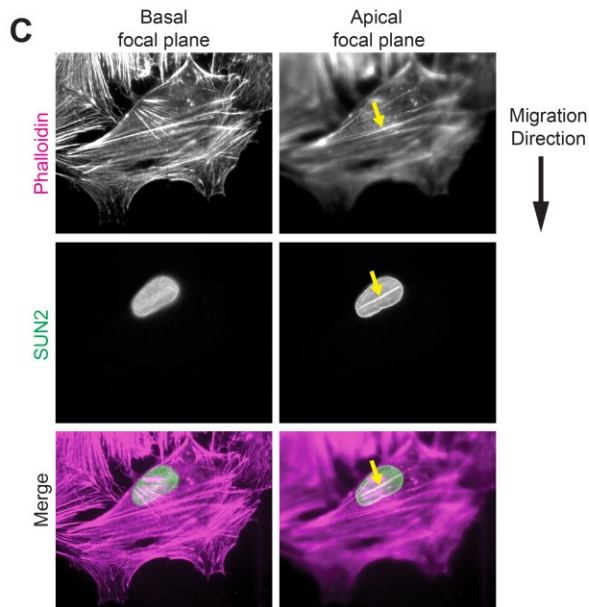

**C.** Paired fluorescent images of basal focal plane and apical focal plane of phalloidin (magenta) and SUN2-specific antibody (green) localizations. The cell is migrating away from neighboring cells into an open area, and the SUN2 signal is in focus on the apical or top surface of the nucleus (arrow).

SUN2 nuclear lines: Stretch 60 mins

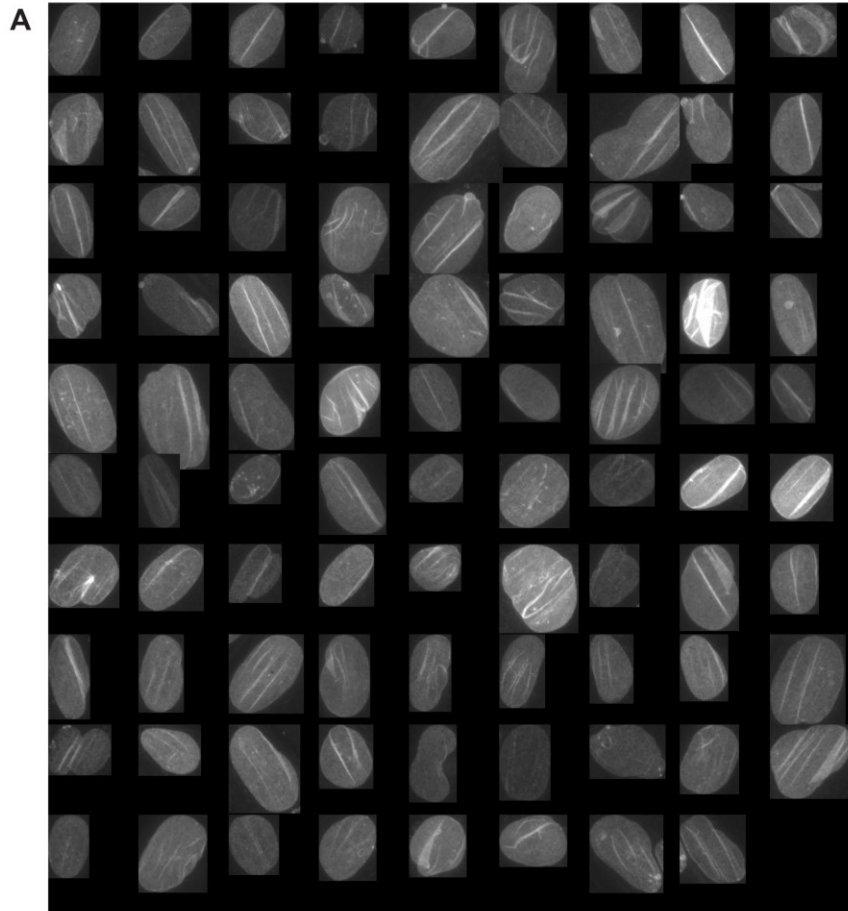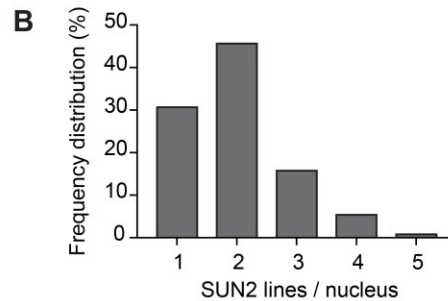

**Supplemental Figure S3. SUN2 nuclear line quality and quantity.**

**A.** Stretch-stimulated (uniaxial cyclic stretch, 15% 0.5 Hz 60 mins) nuclei with immunolocalized SUN2 nuclear envelope proteins are presented as a montage to show the variety of SUN2 distributions observed. **B.** Nuclei were scored for number of SUN2 lines detectable in identically-captured unprocessed images. In a total of 87 nuclei scored from this typical experiment, 31% had single lines/nuclei and 46% had 2 lines/nuclei. There were small numbers of nuclei with 3 (16%), 4 (6%), and 5 (1%) lines/nuclei.

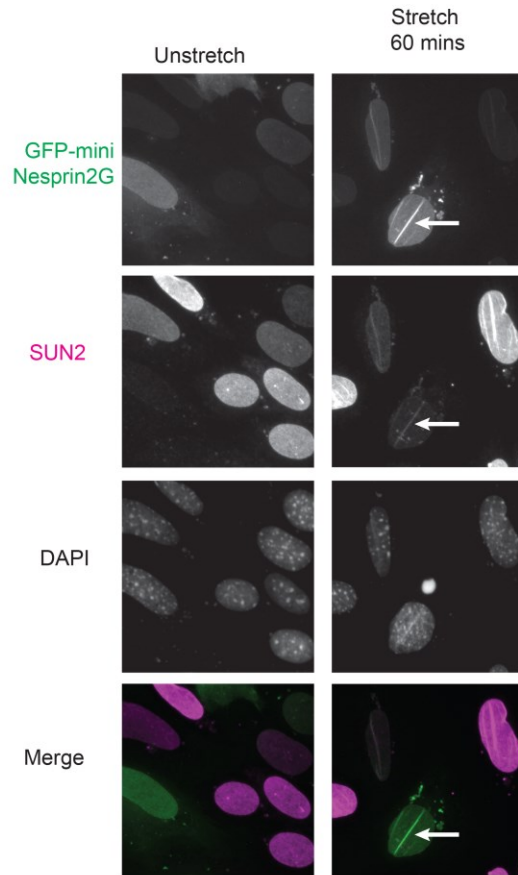

**Supplemental Figure S4. Stretch-induced co-distribution of SUN2 and nesprin proteins.** GFP-mini-Nesprin2G DNA was transiently transfected into fibroblasts, expressed for 48 hrs, then cells were seeded onto silicone membranes and stretch-stimulated (uniaxial cyclic, 15%, 0.5 Hz, 60 mins) and formaldehyde-fixed. SUN2 immunolocalization showed nuclear staining in cells with and without mNsp2G. In stretch-stimulated cells the mNsp2G and SUN2 co-distributed (arrow) along the same linear arrays.



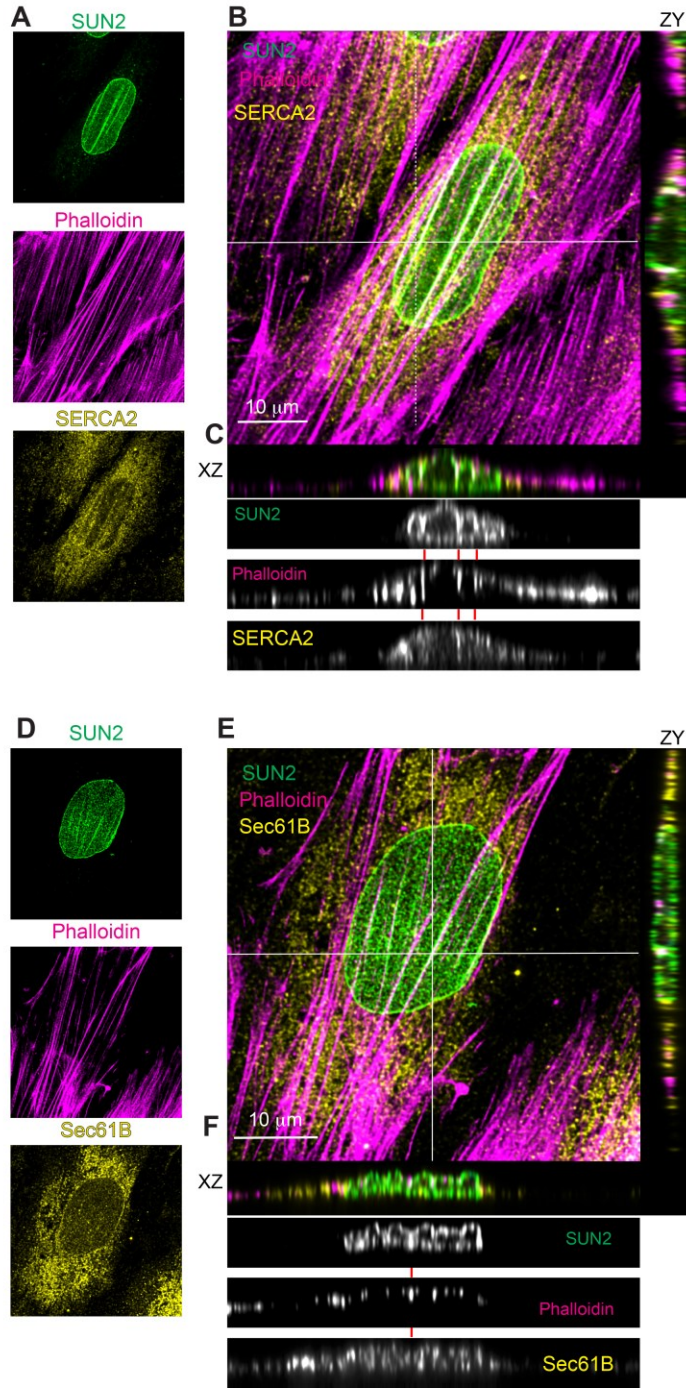

**Supplemental Figure S5. Membrane proteins SERCA2 and Sec61B protein distributions.**

Confocal microscopy of SUN2 (green, Burke mab#3.1E), F-actin (phalloidin, magenta) and endoplasmic reticulum-nuclear membrane proteins SERCA2 and Sec61B (yellow) in stretch-stimulated fibroblasts. A. Maximum intensity projections of SUN2, phalloidin, and SERCA2 confocal sections (0.35 micron steps). B. Orthogonal z-sections across the x (horizontal line, bottom of merge) and y (vertical line, right of merge) planes presented as stack of z sections with end-on view. C. Orthogonal view shows nuclear envelope distribution of SUN2, coincident with F-actin across the top of nucleus (red guidelines). SERCA2 is distributed in the ER around the nucleus and within the nuclear membrane. D. Maximum intensity projections of SUN2, phalloidin, and Sec61B confocal sections (0.35 micron steps). E. Orthogonal z-sections across the x (horizontal line, bottom of merge) and y (vertical line, right of merge) planes are shown in merged image. F. Orthogonal or end-on view shows nuclear envelope distribution of SUN2, coincident with F-actin across the top of nucleus (red guidelines). Sec61B is distributed in the ER around the nucleus and within the nuclear membrane. Scale bar is 10 microns. Associated Videos 4-11.

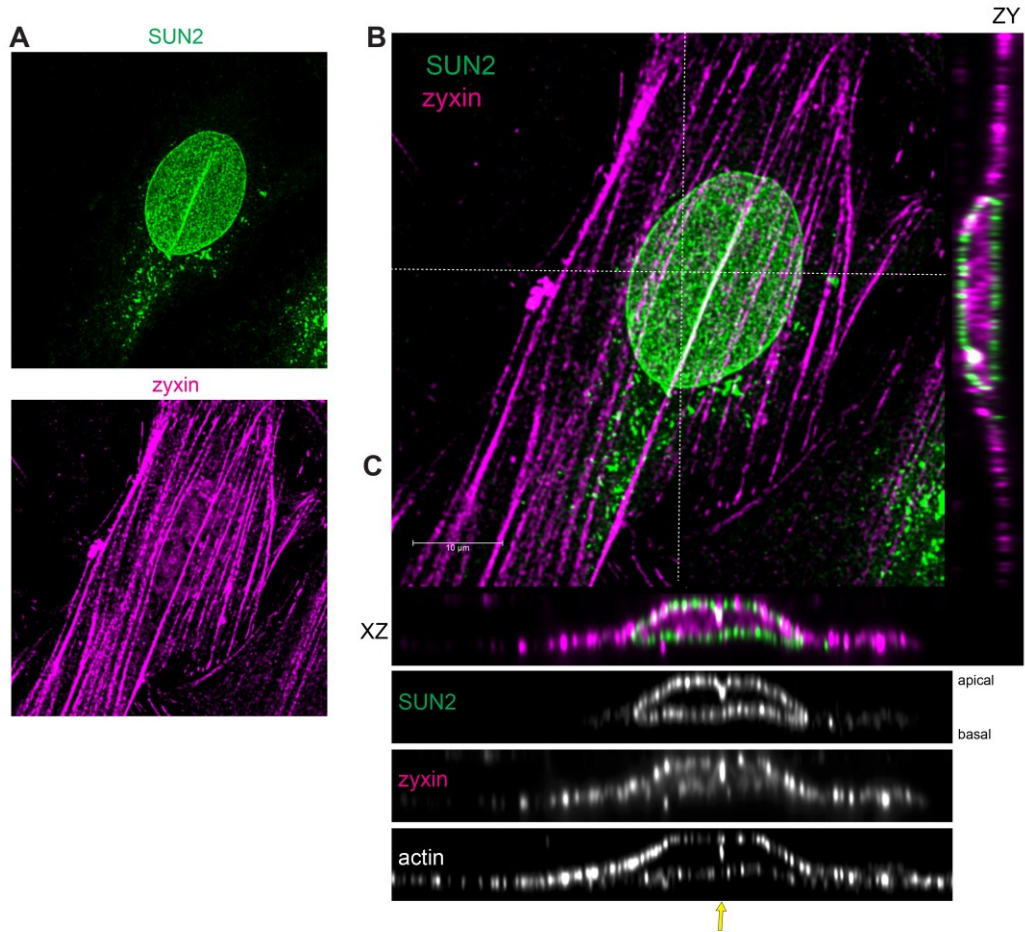

**Supplemental Figure S6. SUN2 and zyxin co-distribution along nuclear lines.** WT mouse fibroblasts were stretch stimulated (uniaxial cyclic stretch 15% 0.5 Hertz 1 hr) then fixed and immuno stained for SUN2 (Burke mab#3.1E@1:10) and zyxin (B71 @1:600). Cells on silicone membrane in PBS were imaged face down in a glass bottom dish by confocal microscopy (Leica SP8) with 0.5 micron steps. A. Maximum projections of a stack of confocal images for SUN2 (green) and zyxin (magenta). B. In Merged image the SUN2 nuclear signal is coincident with zyxin at the nuclear membrane, however zyxin extends along the entire actin filament. C. Orthogonal z sections across the x (horizontal line, bottom of merge) and y (vertical line, right of merge) planes are positioned as apical surface of cell on top and basal surface of cell on bottom for SUN2, zyxin, and F-actin. Scale bar 10 microns. Associated Videos 12-15.

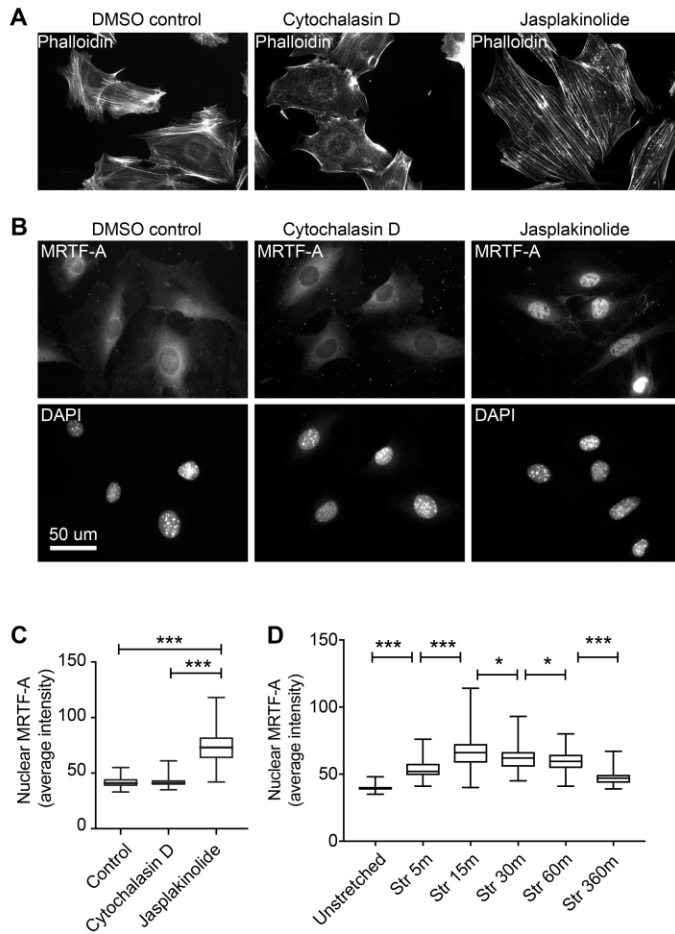

**Supplemental Figure S7. Nuclear translocation of MRTF-A induced by Jasplakinolide-stabilized F-actin.**

A. Cells were treated for 2 hours with DMSO control, Cytochalasin D (250 nM), and Jasplakinolide (100 nM) then fixed and stained with phalloidin to evaluate F-actin. Cytochalasin D blocks F-actin formation and Jasplakinolide induces robust F-actin stress fibers. B. In parallel experiments, immunolocalization of MRTF-A with DAPI stained nuclei show the cytoplasmic distribution of MRTF-A in control and Cytochalasin D-treated cells. MRTF-A translocates to the nucleus in Jasplakinolide-treated cells. C. DAPI images were used to threshold Regions of Interest which were then transferred onto the MRTF-A images. Quantitation of MRTF-A nuclear signal in control (47 nuclei), Cytochalasin D-treated (41 nuclei), and Jasplakinolide-treated (45 nuclei) cells shows the increased nuclear MRTF-A. D. Graph of nuclear MRTF-A signal following time course of uniaxial cyclic stretch (15% 0.5Hz) for 0, 5, 15, 30, 60 minutes and 6 hours with n= 93, 90, 111, 107, 106, 101 nuclei. Nuclei from the same time course were scored for SUN2 nuclear lines revealing 5, 13, 28, 28, 60, 55% of the nuclei with SUN2 nuclear lines. The peak nuclear translocation of MRTF-A (5-15 minutes) precedes the peak SUN2 nuclear lines (60-360 minutes). Box and whisker plots showing median with minimum to maximum range and p-values determined using unpaired student's t-test. \*p<0.05 \*\*\*p<0.0001. Scale bar 50 microns.



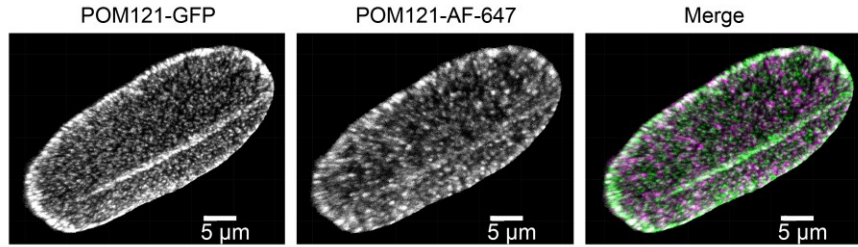

**Supplemental Figure S8. Nuclear pore protein POM121 localization by GFP and by antibody detection.** Maximum intensity projection of a confocal stack of images shows the nuclear rim and nuclear line distribution of transiently transfected POM121-GFP (green) and the immunolocalization with a POM121 antibody (magenta). Scale bar is 5 microns.

## Supplemental Videos

**Video 1. Confocal stack of SUN2 images from a stretch-stimulated cell going from top of the cell to the bottom at 0.35 micron steps (Figure 4E).**

**Video 2. Confocal stack of Phalloidin/F-actin images from a stretch-stimulated cell going from top of the cell to the bottom at 0.35 micron steps (Figure 4E).**

**Video 3. Merged images of SUN2 (green) and phalloidin (magenta) from a stretch-stimulated cell (Figure 4E) with 3D rotation for spatial resolution.**

**Video 4. Confocal stack of SUN2 images from a stretch-stimulated cell going from top of the cell to the bottom at 0.35 micron steps (Figure S5A).**

**Video 5. Confocal stack of phalloidin images from a stretch-stimulated cell going from top of the cell to the bottom at 0.35 micron steps (Figure S5A).**

**Video 6. Confocal stack of SERCA2 images from a stretch-stimulated cell going from top of the cell to the bottom at 0.35 micron steps (Figure S5A).**

**Video 7. Confocal stack of merged images (green-SUN2, magenta-actin, yellow-SERCA2) from a stretch-stimulated cell (Figure S5A) with 3D rotation for spatial resolution.**

**Video 8. Confocal stack of SUN2 images from a stretch-stimulated cell going from top of the cell to the bottom at 0.35 micron steps (Figure S5D).**

**Video 9. Confocal stack of phalloidin images from a stretch-stimulated cell going from top of the cell to the bottom at 0.35 micron steps (Figure S5D).**

**Video 10. Confocal stack of Sec61B images from a stretch-stimulated cell going from top of the cell to the bottom at 0.35 micron steps (Figure S5D).**

**Video 11. Confocal stack of merged images (green-SUN2, magenta-actin, yellow-Sec61B) from a stretch-stimulated cell (Figure S5D) with 3D rotation for spatial resolution.**

**Video 12. Confocal stack of SUN2 images from a stretch-stimulated cell going from top of the cell to the bottom at 0.35 micron steps (Figure S6).**

**Video 13. Confocal stack of zyxin images from a stretch-stimulated cell going from top of the cell to the bottom at 0.35 micron steps (Figure S6).**

**Video 14. Confocal stack of F-actin images from a stretch-stimulated cell going from top of the cell to the bottom at 0.35 micron steps (Figure S6).**

**Video 15. Confocal stack of merged images (green-SUN2, magenta-zyxin) from a stretch-stimulated cell (Figure S6) with 3D rotation for spatial resolution.**
